# Supplementary material for: SARS-CoV-2 Infection, Hospitalization, and Mortality in Adults With and Without Cancer
Source: PubMed Central journal article supplement (PMC10472189; doi:10.1001/jamanetworkopen.2023.31617), 2023-08-31

## Supplemental Online Content

Hosseini-Moghaddam SM, Shepherd FA, Swayze S, Kwong JC, Chan KW. SARS-CoV-2 infection, hospitalization, and mortality in adults with and without cancer. *JAMA Netw Open*. 2023;6(8):e2331617. doi:10.1001/jamanetworkopen.2023.31617

**eTable 1.** Data Sources Used for Comorbidities and Medical Conditions

**eTable 2.** Overall SARS-CoV-2 Infection in the Full Provincial Cohort

**eTable 3.** Multivariable Analysis, Full Provincial Cohort Considering Simultaneous Effect of Cancer Type, Vaccination Status, Age and Sex

**eTable 4.** Determinants of SARS-CoV-2 positivity among patients with cancer

**eTable 5.** The Frequency of Cancer Types in the Cohort and the Cumulative Incidence of SARS-CoV-2 Infection

**eTable 6.** Risk of SARS-CoV-2 Infection in the Cancer Subcohort, Limited Adjusted Cox Proportional Hazard Model Including Vaccination Status, Age, Sex, and Hematologic Malignancies vs Solid Tumors

**eTable 7.** Risk of SARS-CoV-2 Infection in the Cancer Subcohort, Fully-Adjusted Cox Proportional Hazard Model

**eTable 8.** Cumulative Incidence Trends of SARS-CoV-2 Infection in Cancer Subcohort

**eTable 9.** Hospitalization, ICU Admission and Mortality Following SARS-CoV-2 Infection in the Cohort, Limited Adjusted Model (Baseline Group: Noncancer Population With SARS-CoV-2 Infection)

**eTable 10.** Hospitalization, ICU Admission and Mortality Following SARS-CoV-2 Infection in the Cohort, Fully Adjusted Model (Baseline Group: Noncancer Population With SARS-CoV-2 Infection)

**eTable 11.** SARS-CoV-2 Infection, Hospitalization, and Mortality in Solid Tumors and Hematologic Malignancies

**eTable 12.** Risk of Hospitalization, ICU Admission, and Mortality in the Cancer Subcohort (Hematologic Malignancies vs Solid Tumor) Adjusted for Age, Sex, and COVID-19 Vaccination

**eFigure 1.** Study Flow Diagram

**eFigure 2.** Frequency of Cancer Types in the Cohort

**eFigure 3.** Three-Month Trends of SARS-CoV-2 Infection in Cancer Subcohort

This supplemental material has been provided by the authors to give readers additional information about their work.

eTable 1. Data sources used for comorbidities and medical conditions

| Medical Condition                                                      | Definition                                                                                                                                                                                                                                                                                                                                                                                                                                                                                                                                                                                                                                                     |
|------------------------------------------------------------------------|----------------------------------------------------------------------------------------------------------------------------------------------------------------------------------------------------------------------------------------------------------------------------------------------------------------------------------------------------------------------------------------------------------------------------------------------------------------------------------------------------------------------------------------------------------------------------------------------------------------------------------------------------------------|
| Asthma<br>(ICES cohort)                                                | <p>Asthma database was used to identify patients with asthma, based on 2 or more ambulatory care visits and/or 1 or more hospitalizations.</p> <p><u>OHIP</u><br/>OHIP diagnostic code: 493</p> <p><u>CIHI-DAD</u><br/>ICD-9 diagnostic code: 493<br/>ICD-10 diagnostic codes: J45, J46</p>                                                                                                                                                                                                                                                                                                                                                                    |
| Chronic obstructive pulmonary disease (COPD)<br>(ICES specific cohort) | <p>COPD database was used to identify patients with COPD, based on 1 or more ambulatory care visits and/or 1 or more hospitalizations. Algorithm to identify COPD patients were only validated in those ages 35 and over.(2)</p> <p><u>OHIP</u><br/>OHIP diagnostic codes: 491, 492, 496</p> <p><u>CIHI-DAD</u><br/>ICD-9 diagnostic codes: 491, 492, 496<br/>ICD-10 diagnostic codes: J41, J42, J43, J44</p>                                                                                                                                                                                                                                                  |
| Diabetes<br>(ICES cohort)                                              | <p>ODD was used to identify patients with diabetes, based on 2 OHIP diagnostic codes or 1 OHIP service code or 1 CIHI admission within 2 years.(3)</p> <p><u>OHIP</u><br/>OHIP diagnostic code: 250<br/>OHIP service codes: Q040, K029, K030, K045, K046</p> <p><u>CIHI-DAD, CIHI-SDS</u><br/>ICD-9 diagnostic code: 250<br/>ICD-10 diagnostic codes: E10, E11, E13, E14</p>                                                                                                                                                                                                                                                                                   |
| Active cancer                                                          | <p>i) Had any of the following treatments in the past 6 months:<br/>           - Cancer surgery – see “SurgeryIn6Month_CCI_for Active Cancer concept.xlsx” CCI codes in DAD<br/>           - Radiation - using %getnacrs where source = Cancer and DX10CODE1 = Z510<br/>           - Chemotherapy - using %getnacrs where source = Cancer and DX10CODE1 = Z511 or Z512<br/> <b>AND</b> any evidence of cancer diagnosis in OCR prior to last treatment date (surgery, radiation and chemotherapy).</p> <p>II) If not I) (i.e., no recent treatment for cancer), if they had a recent diagnosis – cancer diagnosis in OCR within the past year before index</p> |
| Chronic kidney disease (CKD)<br>(DAD, NACRS, OHIP)                     | <ul style="list-style-type: none"> <li>• CKD diagnosis code in DAD, NACRS, OHIP in 5 years <u>or</u></li> <li>• At least 1 dialysis code in each of the 3 months prior to index</li> <li>• Diagnosis and procedure codes found in concept dictionary</li> </ul> <p><u>OHIP</u><br/>OHIP diagnostic codes: 403, 585</p>                                                                                                                                                                                                                                                                                                                                         |

| Medical Condition                                              | Definition                                                                                                                                                                                                                                                                                                                                                                                                                                                                                                                                                                                                                                                                                                                                                                                                                                                 |
|----------------------------------------------------------------|------------------------------------------------------------------------------------------------------------------------------------------------------------------------------------------------------------------------------------------------------------------------------------------------------------------------------------------------------------------------------------------------------------------------------------------------------------------------------------------------------------------------------------------------------------------------------------------------------------------------------------------------------------------------------------------------------------------------------------------------------------------------------------------------------------------------------------------------------------|
|                                                                | <p><u>CIHI NACRS, CIHI-DAD</u><br/>ICD-10 diagnostic codes: E102, E112, E132, E142, I12, I13, N08, N18, N19</p> <p>Patients who were on chronic dialysis (6) in the year before index date, identified as those with at least 2 of any of the following codes in OHIP, CIHI-DAD, or CIHI-SDS separated by at least 90 days, but less than 150 days</p> <p><u>OHIP</u><br/>OHIP service codes: R849, G323, G325, G326, G860, G862, G865 G863, G866, G330, G331, G332, G333, G861, G082, G083, G085, G090, G091, G092, G093, G094, G095, G096, G294, G295, G864, H540, H740</p> <p><u>CIHI-DAD, CIHI-SDS</u><br/>CCI procedure codes: 5195, 6698<br/>CCP procedure code: 1PZ21</p>                                                                                                                                                                           |
| Advanced liver disease (Cirrhosis or Decompensated Cirrhosis)  | <p>See Lapointe-Shaw 2018 “Identifying cirrhosis...”</p> <p>Any history of: look back to start of data</p> <p>Cirrhosis Algorithm 9<br/>2+ Physician Visit (dxcode 571) <b>or</b><br/>1+ Hospital Diagnosis CIRRHOSIS<br/><u>ICD-9</u> : 456.1, 571.2, 571.5<br/><u>ICD-10</u>: I85.9, I98.2, K70.3, K71.7, K74.6</p> <p>Decompensated Cirrhosis Algorithm 5<br/>1+ Physician Visit CIRRHOSIS (dxcode 571)<br/><b>and</b> (1+ Hospital Diagnosis or 1+ Procedure)<br/><u>ICD-9</u>: 456.0, 456.2, 572.2, 572.3, 572.4, 782.4, 789.5<br/><u>ICD-10</u>: I85.0, I86.4, I98.20, I98.3, K721, K729, K76.6, K76.7, R17, R18<br/><u>CCI</u>: 1.NA.13.BA-FA, 1.NA.13.BA-X7, 1.NA.13.BA-BD, 1.KQ.76GP-NR, 1.OT.52.HA<br/><u>CCP</u>: 1006, 6691<br/><u>OHIP</u>: J057, Z591</p>                                                                                    |
| Immunocompromised (HIV, transplant, immunosuppressive therapy) | <ul style="list-style-type: none"> <li>• HIV (HIV)</li> <li>• Transplant recipient (solid organ or stem cell) <ul style="list-style-type: none"> <li>○ Solid organ transplant (CORR): <ul style="list-style-type: none"> <li>▪ For transplants before December 31, 2019: Use RECIPIENT_TREATMENT dataset in CORR library, and flag individuals where treatment_code=171 and treatment_date was before index date</li> <li>▪ For transplants on/after January 1, 2020: Look for ICD-10 dx, CCI procedure, and OHIP feecodes from DAD, NACRS and OHIP for RENAL, LIVER, LUNG, HEART, PANCREAS, INTESTINE (see “All transplant types – 2021_01_19_JK.xlsx”) <ul style="list-style-type: none"> <li>• Use %dadsdsflags, %nacrsflags, %ohipflags</li> <li>• Create a composite variable that includes all organs</li> </ul> </li> </ul> </li> </ul> </li> </ul> |

| Medical Condition          | Definition                                                                                                                                                                                                                                                                                                                                                                                                                                                                                                                                                                                                                                                                                                                                                                                                                                                                                                                                                                                                                                                                                                                                                                                                                                                                                                                                                                                                                                                                                                                                                                                     |
|----------------------------|------------------------------------------------------------------------------------------------------------------------------------------------------------------------------------------------------------------------------------------------------------------------------------------------------------------------------------------------------------------------------------------------------------------------------------------------------------------------------------------------------------------------------------------------------------------------------------------------------------------------------------------------------------------------------------------------------------------------------------------------------------------------------------------------------------------------------------------------------------------------------------------------------------------------------------------------------------------------------------------------------------------------------------------------------------------------------------------------------------------------------------------------------------------------------------------------------------------------------------------------------------------------------------------------------------------------------------------------------------------------------------------------------------------------------------------------------------------------------------------------------------------------------------------------------------------------------------------------|
|                            | <ul style="list-style-type: none"> <li>○ Allogenic/autologous bone marrow transplant (DAD, OHIP): Identify individuals with any of the following codes from database inception to index date: <ul style="list-style-type: none"> <li>▪ DAD: <ul style="list-style-type: none"> <li>• CCP (prcode) = 53.0</li> <li>• CCI (incode) = 1WY19, 1LZ19HHU7, 1LZ19HHU8</li> </ul> </li> <li>▪ OHIP <ul style="list-style-type: none"> <li>• Feecode = Z426</li> </ul> </li> </ul> </li> <li>• Sickle cell anemia: Use %getdadsds to look for any hospitalization with any diagnosis code with : <ul style="list-style-type: none"> <li>○ ICD9: 282.6</li> <li>○ ICD10: D57.0-D57.2, D57.8</li> </ul> </li> <li>• Other immune system disorders <ul style="list-style-type: none"> <li>○ Any hospitalization, ED visit or physician billing (DAD, NACRS, OHIP; each from database inception) with the following codes: <ul style="list-style-type: none"> <li>▪ DAD/NACRS: <ul style="list-style-type: none"> <li>• ICD-9: 273.2, 279.0, 279.1 , 279.2, 279.3, 279.8, 279.9, 289.8, (NOTE: Only 4-digit ICD9 codes found)</li> <li>• ICD-10: D80, D81, D82, D83, D84, D89</li> </ul> </li> <li>▪ OHIP: dxcode = 279</li> </ul> </li> </ul> </li> <li>• Immunosuppressive therapy (see DIN list: “immunomeds_antineo_25JAN2021.xlsx”) <ul style="list-style-type: none"> <li>○ &gt;30 days (total days supplied) of oral corticosteroid in the 6 months before index</li> <li>○ Receipt of other immunocompromising drug (including antineoplastics) in the 6 months before index</li> </ul> </li> </ul> |
| Inflammatory Bowel Disease | OCCC cohort definition                                                                                                                                                                                                                                                                                                                                                                                                                                                                                                                                                                                                                                                                                                                                                                                                                                                                                                                                                                                                                                                                                                                                                                                                                                                                                                                                                                                                                                                                                                                                                                         |
| Dementia/Frailty           | <p><u>Dementia (ICES cohort):</u><br/>1 hospitalization for dementia and/or 3 ambulatory visits for dementia, each separated by at least 30 days, within 2 years and/or 1 prescription from ODB (9)</p> <p><u>OHIP</u><br/>OHIP diagnostic codes: 290, 331</p> <p><u>CIHI-DAD, CIHI-SDS</u><br/>ICD-9 diagnostic codes: 0461, 290.0, 290.1, 290.2, 290.3, 290.4, 294, 331.0, 331.1, 331.5<br/>ICD-10 diagnostic codes: F00, F01, F02, F03, G30</p> <p><u>ODB</u><br/>1 prescription for a cholinesterase inhibitor</p>                                                                                                                                                                                                                                                                                                                                                                                                                                                                                                                                                                                                                                                                                                                                                                                                                                                                                                                                                                                                                                                                         |

| Medical Condition                                       | Definition                                                                                                                                                                                                                                                                                                                                                                                                                                                                                                                                                                                                                                                                                                                         |
|---------------------------------------------------------|------------------------------------------------------------------------------------------------------------------------------------------------------------------------------------------------------------------------------------------------------------------------------------------------------------------------------------------------------------------------------------------------------------------------------------------------------------------------------------------------------------------------------------------------------------------------------------------------------------------------------------------------------------------------------------------------------------------------------------|
|                                                         | <p><u>Frailty:</u><br/>Hospital Frailty Risk Score - “Summarized” frailty score – Pull all DAD hospitalizations in the 5-years before index, and use %hospfrailty macro to determine “summarized” frailty score per IKN. (Gilbert 2018, Lancet)<br/>NOTE: Codes used in this risk score also include frailty related conditions such as dementia and other chronic conditions that are reported separately.</p>                                                                                                                                                                                                                                                                                                                    |
| Hypertension                                            | HYPER database                                                                                                                                                                                                                                                                                                                                                                                                                                                                                                                                                                                                                                                                                                                     |
| History of congestive heart failure (CHF) (ICES cohort) | <p>CHF database was used to identify patients with CHF, based on 1 CIHI NACRS, CIHI-DAD, CIHI-SDS, or OHIP claim and a second claim (from either) in 1 year. The CHF database is limited to those 40 years of age or older.(11)</p> <p><u>OHIP</u><br/>OHIP diagnostic code: 428</p> <p><u>CIHI-DAD, CIHI-SDS</u><br/>ICD-9 diagnostic code: 428<br/>ICD-10 diagnostic codes: I500, I501, I509</p>                                                                                                                                                                                                                                                                                                                                 |
| History of TIA or Acute Ischemic Stroke                 | <p><u>Transient Ischemic Attack:</u><br/>CIHI-DAD and CIHI-NACRS were used to identify patients with a history of a transient ischemic attack, based on at least 1 hospitalization or ED visit with a diagnosis coded with one of the following codes:</p> <p>ICD-9 diagnostic codes: 435, 3623<br/>ICD-10 diagnostic codes: G450, G451, G452, G453, G458, G459, H340</p> <p><u>Acute Ischemic Stroke (12):</u><br/>CIHI-DAD was used to identify patients with a history of acute ischemic stroke, based on at least 1 hospitalization with a main diagnosis coded with one of the following codes:</p> <p>ICD-9 diagnostic codes: 43301, 43311 43321 43331 43381 43391 434, 436<br/>ICD-10 diagnostic codes: I63, I64, H34.1</p> |
| History of cardiac ischemia                             | <p>Cardiac ischemic disease (DAD, SDS): Any comorbidity in the past 5 years (DAD, any diagnosis field) or history of procedure in past 20 years (DAD, SDS):</p> <p>Comorbidity (DAD, any dx, 5-year lookback):<br/>Angina: ICD-10 diagnostic codes: I20<br/>ICD-9: 413</p> <p>Chronic Ischemic Heart Disease: ICD-10 diagnostic codes: I25<br/>ICD-9: 4140, 4148, 4149</p> <p>Myocardial infarction: ICD-10 diagnostic codes: I21, I22<br/>ICD-9: 410, 411, 412</p>                                                                                                                                                                                                                                                                |

| <b>Medical Condition</b> | <b>Definition</b>                                                                                                                                                                                                                                                                                                                                                                                                                                                                                                                      |
|--------------------------|----------------------------------------------------------------------------------------------------------------------------------------------------------------------------------------------------------------------------------------------------------------------------------------------------------------------------------------------------------------------------------------------------------------------------------------------------------------------------------------------------------------------------------------|
|                          | Procedure (DAD & SDS, 20 year lookback):<br>Coronary Artery Bypass Grafting:<br>CCI procedure codes: 1IJ76<br>CCP procedure codes: 481<br><br>Percutaneous Coronary Intervention:<br>CCI procedure codes: 1IJ50, 1IJ5, 1IJ57<br>CCP procedure codes: 4802, 4803                                                                                                                                                                                                                                                                        |
| Influenza vaccination    | OHIP: Use %getohip (nonlab) to search for any of the following fecodes from the most recent October 1 up to 14 days before index date: G590, G591, G592, Q130, Q590, Q690, Q691<br><br>ODB: Use %getodb to search for any of the following DINs from the most recent October 1 up to 14 days before index date:<br>- 2019/20: 02420643, 02420783, 02432730, 02473283<br>- 2020/21: 02420643, 02420783, 02432730, 02445646, 02494248, 09857645, 09857646<br><br>**NOTE: To include DINs from <65, change default parameter to age 65=F. |
| COVID-19 vaccination     | COVaxON                                                                                                                                                                                                                                                                                                                                                                                                                                                                                                                                |
| Death                    | RPDB                                                                                                                                                                                                                                                                                                                                                                                                                                                                                                                                   |

eTable 2. Overall SARS-CoV-2 infection in the full provincial cohort

| Variable                                   | No Infection<br>N=11,267,534           | SARS-CoV-2<br>Infection<br>N=464,574 | P-<br>value |
|--------------------------------------------|----------------------------------------|--------------------------------------|-------------|
| Sex<br>F<br>M                              | 5,775,885 (51.3%)<br>5,491,649 (48.7%) | 237,819 (51.2%)<br>226,755 (48.8%)   | 0.34        |
| Age, years<br>Mean ± SD                    | 48.89 ± 18.52                          | 44.62 ± 18.33                        | <.001       |
| LTC                                        | 85,518 (0.8%)                          | 13,899 (3.0%)                        | <.001       |
| Income quintile (baseline quintile 5)      |                                        |                                      | <.001       |
| 1                                          | 2,180,735 (19.4%)                      | 113,909 (24.5%)                      |             |
| 2                                          | 2,229,726 (19.8%)                      | 100,380 (21.6%)                      |             |
| 3                                          | 2,263,628 (20.1%)                      | 98,387 (21.2%)                       |             |
| 4                                          | 2,269,818 (20.1%)                      | 82,970 (17.9%)                       |             |
| 5                                          | 2,291,077 (20.3%)                      | 67,459 (14.5%)                       |             |
| Dependency quintile (baseline quintile 1)  |                                        |                                      | <.001       |
| 1                                          | 2,942,942 (26.1%)                      | 154,129 (33.2%)                      |             |
| 2                                          | 2,242,800 (19.9%)                      | 101,600 (21.9%)                      |             |
| 3                                          | 1,961,905 (17.4%)                      | 75,957 (16.3%)                       |             |
| 4                                          | 1,906,678 (16.9%)                      | 65,398 (14.1%)                       |             |
| 5                                          | 2,110,909 (18.7%)                      | 63,485 (13.7%)                       |             |
| Deprivation quintile (baseline quintile 1) |                                        |                                      | <.001       |
| 1                                          | 2,596,662 (23.0%)                      | 79,927 (17.2%)                       |             |
| 2                                          | 2,358,797 (20.9%)                      | 83,908 (18.1%)                       |             |
| 3                                          | 2,137,430 (19.0%)                      | 89,452 (19.3%)                       |             |
| 4                                          | 2,041,147 (18.1%)                      | 95,162 (20.5%)                       |             |
| 5                                          | 2,031,198 (18.0%)                      | 112,120 (24.1%)                      |             |
| Ethnic Diversity Quintile                  |                                        |                                      | <.001       |
| 1                                          | 1,830,395 (16.2%)                      | 33,559 (7.2%)                        |             |
| 2                                          | 1,894,239 (16.8%)                      | 47,038 (10.1%)                       |             |
| 3                                          | 2,019,055 (17.9%)                      | 65,315 (14.1%)                       |             |
| 4                                          | 2,355,143 (20.9%)                      | 101,912 (21.9%)                      |             |
| 5                                          | 3,066,402 (27.2%)                      | 212,745 (45.8%)                      |             |
| Instability quintile (baseline quintile 1) |                                        |                                      | <.001       |
| 1                                          | 2,363,266 (21.0%)                      | 117,997 (25.4%)                      |             |
| 2                                          | 2,110,806 (18.7%)                      | 76,874 (16.5%)                       |             |
| 3                                          | 2,051,056 (18.2%)                      | 72,485 (15.6%)                       |             |
| 4                                          | 2,017,298 (17.9%)                      | 78,099 (16.8%)                       |             |
| 5                                          | 2,622,808 (23.3%)                      | 115,114 (24.8%)                      |             |
| Rural                                      | 1,186,223 (10.5%)                      | 20,311 (4.4%)                        | <.001       |

|                                               |                    |                 |       |
|-----------------------------------------------|--------------------|-----------------|-------|
| PHU region                                    |                    |                 | <.001 |
| Central East                                  | 765,215 (6.8%)     | 15,293 (3.3%)   |       |
| Central West                                  | 2,181,900 (19.4%)  | 78,207 (16.8%)  |       |
| Durham                                        | 539,333 (4.8%)     | 22,122 (4.8%)   |       |
| Eastern                                       | 720,711 (6.4%)     | 10,026 (2.2%)   |       |
| Missing                                       | 28,597 (0.3%)      | 1,278 (0.3%)    |       |
| North                                         | 664,172 (5.9%)     | 9,838 (2.1%)    |       |
| Ottawa                                        | 797,165 (7.1%)     | 22,283 (4.8%)   |       |
| Peel                                          | 1,100,720 (9.8%)   | 85,156 (18.3%)  |       |
| Southwest                                     | 1,332,206 (11.8%)  | 40,887 (8.8%)   |       |
| Toronto                                       | 2,221,850 (19.7%)  | 133,636 (28.8%) |       |
| York                                          | 915,665 (8.1%)     | 45,848 (9.9%)   |       |
| Vaccination Information                       |                    |                 | <.001 |
| Unvaccinated                                  | 1,869,571 (16.6%)  | 421,528 (90.7%) |       |
| 1st Dose                                      | 202,404 (1.8%)     | 20,990 (4.5%)   |       |
| 2nd Dose                                      | 7,503,475 (66.6%)  | 21,920 (4.7%)   |       |
| 3rd Dose                                      | 1,692,084 (15.0%)  | 136 (0.0%)      |       |
| Past healthcare utilization, Mean $\pm$ SD    |                    |                 |       |
| Hospitalization episodes in the past 3 years, | 0.19 $\pm$ 0.64    | 0.23 $\pm$ 0.80 | <.001 |
| Family Doctor Visits in past 12 months        | 3.43 $\pm$ 4.73    | 4.52 $\pm$ 5.52 | <.001 |
| Specialist Doctor Visits in past 12 months    | 1.89 $\pm$ 3.80    | 1.92 $\pm$ 3.87 | <.001 |
| Resource utilization                          |                    |                 | <.001 |
| Non-users                                     | 470,092 (4.2%)     | 12,846 (2.8%)   |       |
| Healthy Users                                 | 192,346 (1.7%)     | 6,583 (1.4%)    |       |
| Low resource utilization                      | 776,232 (6.9%)     | 28,315 (6.1%)   |       |
| Moderate resource utilization                 | 4,342,123 (38.5%)  | 174,404 (37.5%) |       |
| High resource utilization                     | 3,383,476 (30.0%)  | 153,557 (33.1%) |       |
| Very high resource utilization                | 2,103,265 (18.7%)  | 88,869 (19.1%)  |       |
| Charlson Index                                |                    |                 | <.001 |
| 0                                             | 3,533,281 (31.4%)  | 135,063 (29.1%) |       |
| 1                                             | 428,824 (3.8%)     | 18,024 (3.9%)   |       |
| 2                                             | 220,955 (2.0%)     | 11,649 (2.5%)   |       |
| Frailty score                                 | 0.39 $\pm$ 2.05    | 0.63 $\pm$ 3.03 | <.001 |
| Cancer                                        |                    |                 | <.001 |
| Hematologic malignancies                      | 32,708 (0.3%)      | 1,193 (0.3%)    |       |
| Solid tumors                                  | 238,201 (2.1%)     | 7,185 (1.5%)    |       |
| No cancer                                     | 10,996,625 (97.6%) | 456,196 (98.2%) |       |



|                                            |                    |                 |       |
|--------------------------------------------|--------------------|-----------------|-------|
| Cancer type                                |                    |                 | <.001 |
| no cancer                                  | 10,996,625 (97.6%) | 456,196 (98.2%) |       |
| Bladder                                    | 13,010 (0.1%)      | 336 (0.1%)      |       |
| Brain                                      | 1,671 (0.0%)       | 47 (0.0%)       |       |
| Breast                                     | 44,298 (0.4%)      | 1,272 (0.3%)    |       |
| Cervix                                     | 31,037 (0.3%)      | 1,330 (0.3%)    |       |
| Colorectal                                 | 23,346 (0.2%)      | 676 (0.1%)      |       |
| Esophagus                                  | 1,041 (0.0%)       | 24 (0.0%)       |       |
| Kidney                                     | 8,202 (0.1%)       | 271 (0.1%)      |       |
| Larynx                                     | 1,145 (0.0%)       | 29 (0.0%)       |       |
| Liver                                      | 1,898 (0.0%)       | 71 (0.0%)       |       |
| Lung                                       | 15,384 (0.1%)      | 321 (0.1%)      |       |
| Melanoma                                   | 6,331 (0.1%)       | 125 (0.0%)      |       |
| Oropharyngeal                              | 5,737 (0.1%)       | 163 (0.0%)      |       |
| Ovary                                      | 2,881 (0.0%)       | 98 (0.0%)       |       |
| Pancreas                                   | 1,968 (0.0%)       | 39 (0.0%)       |       |
| Prostate                                   | 35,200 (0.3%)      | 1,000 (0.2%)    |       |
| Stomach                                    | 2,699 (0.0%)       | 69 (0.0%)       |       |
| Testis                                     | 1,785 (0.0%)       | 77 (0.0%)       |       |
| Thyroid                                    | 12,387 (0.1%)      | 506 (0.1%)      |       |
| Uterus                                     | 10,015 (0.1%)      | 292 (0.1%)      |       |
| Other solid tumors                         | 18,166 (0.2%)      | 439 (0.1%)      |       |
| Leukemia                                   | 6,548 (0.1%)       | 227 (0.0%)      |       |
| Hodgkin's lymphoma                         | 1,531 (0.0%)       | 64 (0.0%)       |       |
| Non-Hodgkin's lymphoma                     | 11,058 (0.1%)      | 374 (0.1%)      |       |
| Myeloma                                    | 4,047 (0.0%)       | 171 (0.0%)      |       |
| Other hematologic malignancies             | 9,524 (0.1%)       | 357 (0.1%)      |       |
| Comorbidities                              |                    |                 |       |
| CHF                                        | 310,475 (2.8%)     | 14,148 (3.0%)   | <.001 |
| Active liver disease or cirrhosis          | 29,511 (0.3%)      | 1,226 (0.3%)    | 0.79  |
| Chronic kidney disease                     | 258,441 (2.3%)     | 12,738 (2.7%)   | <.001 |
| Hypertension                               | 3,018,659 (26.8%)  | 113,187 (24.4%) | <.001 |
| IBD                                        | 92,763 (0.8%)      | 2,885 (0.6%)    | <.001 |
| Immunocompromised: HIV or Organ transplant | 35,055 (0.3%)      | 1,843 (0.4%)    | <.001 |
| Previous Cardiac ischemia                  | 388,390 (3.4%)     | 13,601 (2.9%)   | <.001 |
| Previous TIA/stroke                        | 101,541 (0.9%)     | 4,455 (1.0%)    | <.001 |
| Asthma                                     | 1,744,456 (15.5%)  | 76,376 (16.4%)  | <.001 |
| COPD                                       | 287,325 (2.6%)     | 9,617 (2.1%)    | <.001 |
| Dementia                                   | 173,697 (1.5%)     | 16,741 (3.6%)   | <.001 |
| Diabetes                                   | 1,504,090 (13.3%)  | 71,955 (15.5%)  | <.001 |

CHF: congestive heart failure, COPD: Chronic obstructive pulmonary disease, IBD: Inflammatory bowel disease, LTC: Long-term care facility, PHU: Public Health Unit, Ontario

Area level income (socioeconomic status) quintile: quintiles 1 and 5 having the lowest and highest median neighborhood incomes. Dependency quintile: quintiles 1 and 5 representing the lowest and highest concentration of people who do not have income from employment. Ethnic diversity quintile: quintiles 1 and 5 representing the lowest and highest area-level concentrations of recent immigrants and people belonging to a visible minority group (i.e., persons, other than aboriginal people, who are non-Canadian in race or non-white in color). Instability quintile: quintiles 1 and 5 representing the lowest and highest area-level concentration of people who experience high rates of family or housing instability. Deprivation quintile: quintile 1 representing neighbourhoods with the lowest material deprivation, and quintile 5 representing neighbourhoods with the highest deprivation

**eTable 3.** Multivariable analysis, full provincial cohort considering simultaneous effect of cancer type, vaccination status, age and sex

| Variable                              | Adjusted HR 95% CI |
|---------------------------------------|--------------------|
| Hematologic malignancies vs no cancer | 1.29 (1.22-1.35)   |
| Solid tumors vs no cancer             | 0.95 (0.93-0.97)   |
| Vaccination status                    |                    |
| 1-dose vs unvaccinated                | 0.62 (0.61-0.63)   |
| 2-dose vs unvaccinated                | 0.17 (0.17-0.17)   |
| 3-dose vs unvaccinated                | 0.15 (0.12-0.18)   |
| Age                                   | 0.99 (0.99-0.99)   |
| Male vs female                        | 0.95 (0.94-0.95)   |

eTable 4. Determinants of SARS-CoV-2 positivity among patients with cancer

| Variable                               | No Infection<br>N=270,909 | SARS-CoV-2<br>Infection<br>N=8,378 | Standardized<br>difference |
|----------------------------------------|---------------------------|------------------------------------|----------------------------|
| Sex                                    |                           |                                    |                            |
| F                                      | 155,009 (57.2%)           | 4,980 (59.4%)                      | 0.05                       |
| M                                      | 115,900 (42.8%)           | 3,398 (40.6%)                      | 0.05                       |
| Age at index date, Mean ± SD           | 63.06 ± 16.10             | 59.61 ± 18.05                      | 0.2                        |
| LTC                                    | 3,712 (1.4%)              | 508 (6.1%)                         | 0.25                       |
| Income quintile <sup>1</sup>           |                           |                                    |                            |
| 1                                      | 50,987 (18.8%)            | 2,079 (24.8%)                      | 0.15                       |
| 2                                      | 54,329 (20.1%)            | 1,805 (21.5%)                      | 0.04                       |
| 3                                      | 53,903 (19.9%)            | 1,677 (20.0%)                      | 0.0                        |
| 4                                      | 53,608 (19.8%)            | 1,502 (17.9%)                      | 0.05                       |
| 5                                      | 57,401 (21.2%)            | 1,281 (15.3%)                      | 0.15                       |
| Dependency quintile <sup>1</sup>       |                           |                                    |                            |
| 1                                      | 52,826 (19.5%)            | 2,245 (26.8%)                      | 0.17                       |
| 2                                      | 48,709 (18.0%)            | 1,740 (20.8%)                      | 0.07                       |
| 3                                      | 47,987 (17.7%)            | 1,406 (16.8%)                      | 0.02                       |
| 4                                      | 51,018 (18.8%)            | 1,317 (15.7%)                      | 0.08                       |
| 5                                      | 68,178 (25.2%)            | 1,594 (19.0%)                      | 0.15                       |
| Deprivation quintile <sup>1</sup>      |                           |                                    |                            |
| 1                                      | 62,096 (22.9%)            | 1,485 (17.7%)                      | 0.13                       |
| 2                                      | 56,820 (21.0%)            | 1,513 (18.1%)                      | 0.07                       |
| 3                                      | 52,231 (19.3%)            | 1,566 (18.7%)                      | 0.01                       |
| 4                                      | 49,754 (18.4%)            | 1,728 (20.6%)                      | 0.06                       |
| 5                                      | 47,817 (17.7%)            | 2,010 (24.0%)                      | 0.16                       |
| Ethnic diversity quintile <sup>1</sup> |                           |                                    |                            |
| 1                                      | 55,375 (20.4%)            | 777 (9.3%)                         | 0.32                       |
| 2                                      | 53,254 (19.7%)            | 1,005 (12.0%)                      | 0.21                       |
| 3                                      | 51,330 (18.9%)            | 1,336 (15.9%)                      | 0.08                       |
| 4                                      | 52,585 (19.4%)            | 1,870 (22.3%)                      | 0.07                       |
| 5                                      | 56,174 (20.7%)            | 3,314 (39.6%)                      | 0.42                       |
| Instability quintile <sup>1</sup>      |                           |                                    |                            |
| 1                                      | 49,121 (18.1%)            | 1,795 (21.4%)                      | 0.08                       |
| 2                                      | 51,639 (19.1%)            | 1,373 (16.4%)                      | 0.07                       |
| 3                                      | 52,519 (19.4%)            | 1,357 (16.2%)                      | 0.08                       |
| 4                                      | 51,880 (19.2%)            | 1,492 (17.8%)                      | 0.03                       |
| 5                                      | 63,559 (23.5%)            | 2,285 (27.3%)                      | 0.09                       |

|                                               |                 |               |      |
|-----------------------------------------------|-----------------|---------------|------|
| Rural <sup>1</sup>                            |                 |               |      |
| PHU region                                    | 33,633 (12.4%)  | 408 (4.9%)    | 0.27 |
| Central East                                  | 21,803 (8.0%)   | 278 (3.3%)    | 0.21 |
| Central West                                  | 53,629 (19.8%)  | 1,499 (17.9%) | 0.05 |
| Durham                                        | 12,724 (4.7%)   | 392 (4.7%)    | 0    |
| Eastern                                       | 20,625 (7.6%)   | 218 (2.6%)    | 0.23 |
| Missing                                       | 579 (0.2%)      | 28 (0.3%)     | 0.02 |
| North                                         | 18,479 (6.8%)   | 192 (2.3%)    | 0.22 |
| Ottawa                                        | 17,487 (6.5%)   | 351 (4.2%)    | 0.1  |
| Peel                                          | 20,614 (7.6%)   | 1,268 (15.1%) | 0.24 |
| Southwest                                     | 35,328 (13.0%)  | 811 (9.7%)    | 0.11 |
| Toronto                                       | 49,139 (18.1%)  | 2,432 (29.0%) | 0.26 |
| York                                          | 20,502 (7.6%)   | 909 (10.8%)   | 0.11 |
| Vaccination                                   |                 |               |      |
| Unvaccinated                                  | 43,516 (16.1%)  | 7,249 (86.5%) | 1.99 |
| 1st Dose                                      | 4,163 (1.5%)    | 613 (7.3%)    | 0.28 |
| ≥ 2 Dose                                      | 223,230 (82.4%) | 516 (6.2%)    | 1.23 |
| Past healthcare utilization, Mean ± SD        |                 |               |      |
| Hospital admissions in the past 3 years       | 0.80 ± 1.29     | 0.93 ± 1.54   | 0.09 |
| Family Doctor Visits in past 12 months        | 5.16 ± 5.49     | 6.67 ± 7.10   | 0.24 |
| Specialist Doctor Visits in past 12 months    | 7.31 ± 6.98     | 7.34 ± 7.45   | 0    |
| Resource utilization                          |                 |               |      |
| Non-user, healthy-user, or low resource users | 676 (0.2%)      | 19 (0.2%)     | 0.01 |
| Moderate resource utilization                 | 25,487 (9.4%)   | 736 (8.8%)    | 0.02 |
| High resource utilization                     | 75,185 (27.8%)  | 2,414 (28.8%) | 0.02 |
| Very high resource utilization                | 169,475 (62.6%) | 5,209 (62.2%) | 0.01 |
| Frailty score, Mean ± SD                      | 1.45 ± 3.76     | 2.19 ± 5.32   | 0.16 |
| Cancer                                        |                 |               |      |
| Hematologic malignancies                      | 32,708 (12.1%)  | 1,193 (14.2%) | 0.06 |
| Solid tumors                                  | 238,201 (87.9%) | 7,185 (85.8%) | 0.06 |

|                                            |                 |               |      |
|--------------------------------------------|-----------------|---------------|------|
| Cancer type                                |                 |               |      |
| Bladder                                    | 13,010 (4.8%)   | 336 (4.0%)    | 0.04 |
| Brain                                      | 1,671 (0.6%)    | 47 (0.6%)     | 0.01 |
| Breast                                     | 44,298 (16.4%)  | 1,272 (15.2%) | 0.03 |
| Cervix                                     | 31,037 (11.5%)  | 1,330 (15.9%) | 0.13 |
| Colorectal                                 | 23,346 (8.6%)   | 676 (8.1%)    | 0.02 |
| Esophagus                                  | 1,041 (0.4%)    | 24 (0.3%)     | 0.02 |
| Kidney                                     | 8,202 (3.0%)    | 271 (3.2%)    | 0.01 |
| Larynx                                     | 1,145 (0.4%)    | 29 (0.3%)     | 0.01 |
| Liver                                      | 1,898 (0.7%)    | 71 (0.8%)     | 0.02 |
| Lung                                       | 15,384 (5.7%)   | 321 (3.8%)    | 0.09 |
| Melanoma                                   | 6,331 (2.3%)    | 125 (1.5%)    | 0.06 |
| Oropharyngeal                              | 5,737 (2.1%)    | 163 (1.9%)    | 0.01 |
| Ovary                                      | 2,881 (1.1%)    | 98 (1.2%)     | 0.01 |
| Pancreas                                   | 1,968 (0.7%)    | 39 (0.5%)     | 0.03 |
| Prostate                                   | 35,200 (13.0%)  | 1,000 (11.9%) | 0.03 |
| Stomach                                    | 2,699 (1.0%)    | 69 (0.8%)     | 0.02 |
| Testis                                     | 1,785 (0.7%)    | 77 (0.9%)     | 0.03 |
| Thyroid                                    | 12,387 (4.6%)   | 506 (6.0%)    | 0.07 |
| Uterus                                     | 10,015 (3.7%)   | 292 (3.5%)    | 0.01 |
| Other solid tumors                         | 18,166 (6.7%)   | 439 (5.2%)    | 0.06 |
| Leukemia                                   | 6,548 (2.4%)    | 227 (2.7%)    | 0.02 |
| Hodgkin's lymphoma                         | 1,531 (0.6%)    | 64 (0.8%)     | 0.02 |
| Non-Hodgkin's lymphoma                     | 11,058 (4.1%)   | 374 (4.5%)    | 0.02 |
| Myeloma                                    | 4,047 (1.5%)    | 171 (2.0%)    | 0.04 |
| Other hematologic malignancies             | 9,524 (3.5%)    | 357 (4.3%)    | 0.04 |
| Comorbidities                              |                 |               |      |
| CHF                                        | 21,974 (8.1%)   | 828 (9.9%)    | 0.06 |
| Active liver disease or cirrhosis          | 3,029 (1.1%)    | 124 (1.5%)    | 0.03 |
| Chronic kidney disease                     | 20,600 (7.6%)   | 779 (9.3%)    | 0.06 |
| Hypertension                               | 140,042 (51.7%) | 4,219 (50.4%) | 0.03 |
| IBD                                        | 3,167 (1.2%)    | 88 (1.1%)     | 0.01 |
| Immunocompromised: HIV or Organ transplant | 3,008 (1.1%)    | 128 (1.5%)    | 0.04 |
| Previous Cardiac ischemia                  | 22,949 (8.5%)   | 671 (8.0%)    | 0.02 |
| Previous TIA/stroke                        | 6,050 (2.2%)    | 207 (2.5%)    | 0.02 |
| Asthma                                     | 42,013 (15.5%)  | 1,417 (16.9%) | 0.04 |
| COPD                                       | 21,639 (8.0%)   | 618 (7.4%)    | 0.02 |
| Dementia                                   | 8,217 (3.0%)    | 647 (7.7%)    | 0.21 |
| Diabetes mellitus                          | 66,564 (24.6%)  | 2,475 (29.5%) | 0.11 |

1 Missing: < 1%

IBD: Inflammatory bowel disease, COPD: Chronic obstructive pulmonary disease, LTC: Long-term care facility, PHU: Public Health Unit, Ontario

Area level income (socioeconomic status) quintile: quintiles 1 and 5 having the lowest and highest median neighborhood incomes. Dependency quintile: quintiles 1 and 5 representing the lowest and highest concentration of people who do not have income from employment. Ethnic diversity quintile: quintiles 1 and 5 representing the lowest and highest area-level concentrations of recent immigrants and people belonging to a visible minority group (i.e., persons, other than aboriginal people, who are non-Canadian in race or non-white in color). Instability quintile: quintiles 1 and 5 representing the lowest and highest area-level concentration of people who experience high rates of family or housing instability. Deprivation quintile: quintile 1 representing neighbourhoods with the lowest material deprivation, and quintile 5 representing neighbourhoods with the highest deprivation

**eTable 5.** The frequency of cancer types in the cohort and the cumulative incidence of SARS-CoV-2 infection

| Cancer type                                 | Number of patients in cohort | Number of patients with SARS-CoV-2 infection (%) |
|---------------------------------------------|------------------------------|--------------------------------------------------|
| Solid tumor, cancer                         |                              |                                                  |
| Breast                                      | 45,570                       | 1,272 (2.8%)                                     |
| Prostate                                    | 36,200                       | 1,000 (2.8%)                                     |
| Cervix                                      | 32,367                       | 1,330 (4.1%)                                     |
| Colorectal                                  | 24,022                       | 676 (2.8%)                                       |
| Lung                                        | 15,705                       | 321 (2.0%)                                       |
| Bladder                                     | 13,346                       | 336 (2.5%)                                       |
| Thyroid                                     | 12,893                       | 506 (3.9%)                                       |
| Uterus                                      | 10,307                       | 292 (2.8%)                                       |
| Kidney                                      | 8,473                        | 271 (3.2%)                                       |
| Melanoma                                    | 6,456                        | 125 (1.9%)                                       |
| Oropharyngeal                               | 5,900                        | 163 (2.8%)                                       |
| Ovary                                       | 2,979                        | 98 (3.3%)                                        |
| Stomach                                     | 2,768                        | 69 (2.5%)                                        |
| Pancreas                                    | 2,007                        | 39 (1.9%)                                        |
| Liver                                       | 1,969                        | 71 (3.6%)                                        |
| Testis                                      | 1,862                        | 77 (4.1%)                                        |
| Brain                                       | 1,718                        | 47 (2.7%)                                        |
| Larynx                                      | 1,174                        | 29 (2.5%)                                        |
| Esophagus                                   | 1,065                        | 24 (2.3%)                                        |
| Other solid tumors <sup>1</sup>             | 18,605                       | 439 (2.4%)                                       |
| Hematologic malignancies                    |                              |                                                  |
| Non-Hodgkin's lymphoma                      | 11,432                       | 374 (3.3%)                                       |
| Leukemia                                    | 6,775                        | 227 (3.4%)                                       |
| Myeloma                                     | 4,218                        | 171 (4.1%)                                       |
| Hodgkin's lymphoma                          | 1,595                        | 64 (4.0%)                                        |
| Other hematologic malignancies <sup>2</sup> | 9,881                        | 357 (3.6%)                                       |
| Total                                       | 279,287                      | 8,378 (3.0%)                                     |

<sup>1</sup> All remaining topographic and histologic codes excluding cancers of the bladder, brain, breast, cervix, colorectal, esophagus, kidney, larynx, liver, lung, melanoma, oral cavity and pharynx, ovary, pancreas, prostate, stomach, testis, thyroid, and uterus

<sup>2</sup> All histologic codes excluding leukemia, Hodgkin's lymphoma, non-Hodgkin's lymphoma and myeloma

**eTable 6.** Risk of SARS-CoV-2 infection in the cancer subcohort, limited adjusted Cox proportional hazard model including vaccination status, age, sex, and hematologic malignancies vs solid tumors

| Variable                                            | Adjusted hazard ratio (95% CI) |
|-----------------------------------------------------|--------------------------------|
| Age, 1 year increase                                | 0.99 (0.99-0.99)               |
| Sex (male vs female)                                | 1.01 (0.97-1.05)               |
| Hematologic malignancies vs solid tumors            | 1.33 (1.26-1.41)               |
| COVID-19 vaccination status (baseline unvaccinated) |                                |
| 1-dose                                              | 0.54 (0.50-0.58)               |
| 2-dose                                              | 0.14 (0.12-0.15)               |
| 3-dose                                              | 0.13 (0.07-0.23)               |

eTable 7. Risk of SARS-CoV-2 infection in the cancer subcohort, fully-adjusted Cox proportional hazard model

| Variable                                                     | Adjusted hazard ratio (95% CI) |
|--------------------------------------------------------------|--------------------------------|
| Hematologic malignancies vs solid tumors                     | 1.23 (1.16-1.30)               |
| COVID-19 vaccination status (baseline unvaccinated)          |                                |
| 1-dose                                                       | 0.55 (0.51-0.60)               |
| 2-dose                                                       | 0.13 (0.12-0.15)               |
| 3-dose                                                       | 0.08 (0.04-0.15)               |
| Age, 1 year increase                                         | 0.99 (0.99-0.99)               |
| Sex (male vs female)                                         | 1.06 (1.01-1.10)               |
| LTC residents                                                | 8.63 (7.87-9.46)               |
| Income quintile (baseline quintile 5) <sup>1</sup>           |                                |
| 1                                                            | 1.12 (0.99-1.26)               |
| 2                                                            | 1.10 (1.00-1.21)               |
| 3                                                            | 1.12 (1.03-1.22)               |
| 4                                                            | 1.11 (1.04-1.20)               |
| Instability quintile (baseline quintile 1) <sup>1</sup>      |                                |
| 2                                                            | 0.95 (0.89-1.01)               |
| 3                                                            | 0.90 (0.84-0.97)               |
| 4                                                            | 0.87 (0.81-0.94)               |
| 5                                                            | 0.81 (0.75-0.88)               |
| Deprivation quintile (baseline quintile 1) <sup>1</sup>      |                                |
| 2                                                            | 1.06 (0.99-1.13)               |
| 3                                                            | 1.14 (1.06-1.23)               |
| 4                                                            | 1.28 (1.18-1.40)               |
| 5                                                            | 1.45 (1.32-1.60)               |
| Dependency quintile (baseline quintile 1) <sup>1</sup>       |                                |
| 2                                                            | 0.99 (0.93-1.05)               |
| 3                                                            | 0.94 (0.88-1.00)               |
| 4                                                            | 0.92 (0.86-0.98)               |
| 5                                                            | 1.07 (1.00-1.15)               |
| Ethnic diversity quintile (baseline quintile 1) <sup>1</sup> |                                |
| 2                                                            | 1.17 (1.08-1.28)               |
| 3                                                            | 1.30 (1.19-1.41)               |
| 4                                                            | 1.49 (1.36-1.63)               |
| 5                                                            | 1.78 (1.62-1.96)               |
| Public Health region (baseline York region)                  |                                |
| Central East                                                 | 0.40 (0.35-0.45)               |
| Central West                                                 | 0.77 (0.71-0.84)               |
| Durham                                                       | 0.78 (0.69-0.87)               |
| Eastern                                                      | 0.34 (0.29-0.39)               |
| North                                                        | 0.34 (0.30-0.40)               |
| Ottawa                                                       | 0.56 (0.50-0.63)               |
| Peel                                                         | 1.18 (1.09-1.28)               |
| Southwest                                                    | 0.69 (0.63-0.76)               |
| Toronto                                                      | 1.03 (0.95-1.11)               |

1 Missing: < 1%

LTC: Long-term care facility, PHU: Public Health Unit, Ontario

Area level income (socioeconomic status) quintile: quintiles 1 and 5 having the lowest and highest median neighborhood incomes. Dependency quintile: quintiles 1 and 5 representing the lowest and highest concentration of people who do not have income from employment. Ethnic diversity quintile: quintiles 1 and 5 representing the lowest and highest area-level concentrations of recent immigrants and people belonging to a visible minority group (i.e., persons, other than aboriginal people, who are non-Canadian in race or non-white in color). Instability quintile: quintiles 1 and 5 representing the lowest and highest area-level concentration of people who experience high rates of family or housing instability. Deprivation quintile: quintile 1 representing neighbourhoods with the lowest material deprivation, and quintile 5 representing neighbourhoods with the highest deprivation

**eTable 8.** Cumulative incidence trends of SARS-CoV-2 infection in cancer subcohort

| 3-month trend                                        | General Population Cohort<br>N=4,56,240 | Cancer Cohort<br>N=8,378 | Patients with hematologic malignancies<br>N= 1,193 | Patients with solid tumors<br>N= 7,185 |
|------------------------------------------------------|-----------------------------------------|--------------------------|----------------------------------------------------|----------------------------------------|
| Jan 1 <sup>st</sup> - March 31 <sup>st</sup> , 2020  | 3,624 (0.78)                            | 102 (0.02)               | 22 (0.26)                                          | 80 (0.95)                              |
| April 1 <sup>st</sup> - June 30 <sup>th</sup> , 2020 | 26,744 (5.76)                           | 710 (0.15)               | 116 (1.38)                                         | 594 (7.09)                             |
| July 1 <sup>st</sup> - Sept 30 <sup>th</sup> , 2020  | 14,455 (3.11)                           | 214 (0.05)               | 32 (0.38)                                          | 182 (2.17)                             |
| Oct 1 <sup>st</sup> - Dec 31 <sup>st</sup> , 2020    | 10,6276 (22.87)                         | 1,929 (0.42)             | 269 (3.21)                                         | 1,660 (19.81)                          |
| Jan 1 <sup>st</sup> - March 31 <sup>st</sup> , 2021  | 122,702 (26.41)                         | 2,386 (0.51)             | 322 (3.84)                                         | 2,064 (24.64)                          |
| April 1 <sup>st</sup> - June 30 <sup>th</sup> , 2021 | 133,003 (28.63)                         | 2,187 (0.47)             | 289 (3.45)                                         | 1,898 (22.65)                          |
| July 1 <sup>st</sup> - Sept 30 <sup>th</sup> , 2021  | 27,980 (6.02)                           | 451 (0.1)                | 74 (0.88)                                          | 377 (4.5)                              |
| Oct 1 <sup>st</sup> - Nov 30 <sup>th</sup> , 2021    | 21,456 (4.62)                           | 399 (0.09)               | 69 (0.82)                                          | 330 (3.94)                             |

**eTable 9.** Hospitalization, ICU admission and mortality following SARS-CoV-2 infection in the cohort, limited adjusted model (baseline group: noncancer population with SARS-CoV-2 infection)

| Variable                                            | Adjusted HR (95% CI)   |                      |                  |
|-----------------------------------------------------|------------------------|----------------------|------------------|
|                                                     | 14-day hospitalization | 21-day ICU admission | 28-day mortality |
| Hematologic malignancies vs noncancer               | 2.07 (1.85-2.31)       | 1.13 (0.92-1.39)     | 2.08 (1.78-2.44) |
| Solid tumors vs noncancer                           | 1.31 (1.23-1.39)       | 0.94 (0.83-1.07)     |                  |
| COVID-19 vaccination status (baseline unvaccinated) |                        |                      |                  |
| 1-dose                                              | 0.75 (0.72-0.79)       | 0.79 (0.71-0.89)     | 0.53 (0.48-0.59) |
| ≥2-dose                                             | 0.45 (0.41-0.48)       | 0.79 (0.67-0.92)     | 0.49 (0.44-0.56) |
| Age, 1 year increase                                | 1.05 (1.05-1.05)       | 0.99 (0.99-0.99)     | 1.10 (1.10-1.11) |
| Sex (male vs female)                                | 1.47 (1.43-1.50)       | 1.42 (1.36-1.49)     | 1.91 (1.83-1.99) |

**eTable 10.** Hospitalization, ICU admission and mortality following SARS-CoV-2 infection in the cohort, fully adjusted model (baseline group: noncancer population with SARS-CoV-2 infection)



| Variable                                                | Adjusted hazard ratio (95% CI) |                      |                  |
|---------------------------------------------------------|--------------------------------|----------------------|------------------|
|                                                         | 14-day hospitalization         | 21-day ICU admission | 28-day mortality |
| Hematologic malignancies vs noncancer                   | 1.75(1.57-1.96)                | 1.14 (0.93-1.40)     | 2.04 (1.74-2.38) |
| Solid tumors vs noncancer                               | 1.11 (1.05-1.18)               | 0.93 (0.82-1.05)     | 1.31 (1.19-1.44) |
| COVID-19 vaccination status<br>(baseline: unvaccinated) |                                |                      |                  |
| 1-dose                                                  | 0.68 (0.64-0.71)               | 0.76 (0.68-0.85)     | 0.57 (0.51-0.63) |
| ≥2-dose                                                 | 0.42 (0.39-0.46)               | 0.74 (0.63-0.87)     | 0.50 (0.45-0.57) |
| Age, 1 year increase                                    | 1.05 (1.05-1.05)               | 0.99 (0.99-1.00)     | 1.10 (1.10-1.10) |
| Sex (male vs female)                                    | 1.39 (1.35-1.42)               | 1.41 (1.34-1.47)     | 1.89 (1.81-1.97) |
| LTC                                                     | 0.29 (0.27-0.30)               | 0.53 (0.46-0.60)     | 1.24 (1.18-1.30) |
| Income quintile<br>(baseline: quintile 5)               |                                |                      |                  |
| 1                                                       | 1.14 (1.06-1.23)               | 1.05 (0.91-1.21)     | 1.12 (0.99-1.27) |
| 2                                                       | 1.07 (1.01-1.14)               | 1.03 (0.92-1.15)     | 1.15 (1.04-1.27) |
| 3                                                       | 1.09 (1.04-1.15)               | 0.97 (0.88-1.07)     | 1.08 (0.99-1.18) |
| 4                                                       | 1.02 (0.98-1.07)               | 0.98 (0.89-1.07)     | 1.01 (0.93-1.09) |
| Instability quintile<br>(baseline: quintile 1)          |                                |                      |                  |
| 2                                                       | 1.03 (0.99-1.07)               | 1.03 (0.95-1.11)     | 1.08 (0.99-1.17) |
| 3                                                       | 1.03 (0.99-1.08)               | 0.97 (0.89-1.05)     | 1.08 (0.99-1.17) |
| 4                                                       | 1.05 (1.00-1.10)               | 0.89 (0.82-0.97)     | 1.04 (0.96-1.13) |
| 5                                                       | 1.08 (1.03-1.13)               | 0.85 (0.77-0.92)     | 1.06 (0.97-1.15) |
| Deprivation quintile<br>(baseline: quintile 1)          |                                |                      |                  |
| 2                                                       | 1.01 (0.96-1.05)               | 1.07 (0.98-1.16)     | 1.05 (0.98-1.13) |
| 3                                                       | 1.01 (0.97-1.06)               | 1.19 (1.09-1.31)     | 1.10 (1.02-1.19) |
| 4                                                       | 1.04 (0.99-1.10)               | 1.22 (1.10-1.35)     | 1.11 (1.02-1.21) |
| 5                                                       | 1.13 (1.07-1.20)               | 1.25 (1.12-1.40)     | 1.22 (1.11-1.34) |
| Dependency quintile<br>(baseline: quintile 1)           |                                |                      |                  |
| 2                                                       | 1.02 (0.99-1.06)               | 1.04 (0.98-1.11)     | 1.06 (0.99-1.14) |
| 3                                                       | 1.00 (0.97-1.04)               | 0.95 (0.88-1.02)     | 1.09 (1.02-1.17) |
| 4                                                       | 0.99 (0.95-1.03)               | 1.00 (0.93-1.08)     | 1.05 (0.98-1.13) |
| 5                                                       | 0.93 (0.89-0.96)               | 0.91 (0.84-0.98)     | 1.04 (0.97-1.12) |
| Ethnic diversity quintile<br>(baseline: quintile 1)     |                                |                      |                  |
| 2                                                       | 1.08 (1.02-1.14)               | 0.93 (0.83-1.02)     | 1.18 (1.08-1.28) |
| 3                                                       | 1.16 (1.10-1.23)               | 0.86 (0.78-0.96)     | 1.23 (1.13-1.34) |
| 4                                                       | 1.19 (1.12-1.26)               | 0.82 (0.74-0.91)     | 1.07 (0.97-1.17) |
| 5                                                       | 1.24 (1.16-1.31)               | 0.88 (0.78-0.98)     | 1.12 (1.02-1.24) |
| Public Health region<br>(baseline: York region)         |                                |                      |                  |
| Central East                                            | 0.98 (0.90-1.06)               | 1.15 (0.99-1.34)     | 1.27 (1.11-1.45) |
| Central West                                            | 0.90 (0.85-0.94)               | 1.30 (1.18-1.43)     | 1.00 (0.91-1.09) |
| Durham                                                  | 0.86 (0.81-0.93)               | 1.34 (1.17-1.52)     | 1.03 (0.91-1.17) |
| Eastern                                                 | 0.90 (0.82-0.99)               | 1.65 (1.39-1.94)     | 1.00 (0.86-1.17) |
| North                                                   | 1.30 (1.19-1.43)               | 1.28 (1.08-1.52)     | 1.22 (1.03-1.45) |
| Ottawa                                                  | 0.86 (0.80-0.92)               | 1.31 (1.15-1.50)     | 1.17 (1.04-1.30) |

|                           |                  |                  |                  |
|---------------------------|------------------|------------------|------------------|
| Peel                      | 0.95 (0.91-1.00) | 0.96 (0.88-1.06) | 0.99 (0.90-1.08) |
| Southwest                 | 0.99 (0.93-1.05) | 1.13 (1.01-1.27) | 1.09 (0.98-1.21) |
| Toronto                   | 0.98 (0.94-1.03) | 1.11 (1.01-1.21) | 1.05 (0.97-1.14) |
| Deyo-Charlson comorbidity |                  |                  |                  |
| 2                         | 1.40 (1.35-1.46) | 1.07 (0.99-1.15) | 1.41 (1.34-1.50) |
| ≥3                        | 1.89 (1.81-1.96) | 1.07 (0.99-1.16) | 1.99 (1.89-2.11) |

LTC: Long-term care facility, PHU: Public Health Unit, Ontario

Area level income (socioeconomic status) quintile: quintiles 1 and 5 having the lowest and highest median neighborhood incomes. Dependency quintile: quintiles 1 and 5 representing the lowest and highest concentration of people who do not have income from employment. Ethnic diversity quintile: quintiles 1 and 5 representing the lowest and highest area-level concentrations of recent immigrants and people belonging to a visible minority group (i.e., persons, other than aboriginal people, who are non-Canadian in race or non-white in color). Instability quintile: quintiles 1 and 5 representing the lowest and highest area-level concentration of people who experience high rates of family or housing instability. Deprivation quintile: quintile 1 representing neighbourhoods with the lowest material deprivation, and quintile 5 representing neighbourhoods with the highest deprivation

**eTable 11.** SARS-CoV-2 infection, hospitalization, and mortality in solid tumors and hematologic malignancies

| Cancer type                          | SARS-CoV-2 infection, N | 14-day hospitalization rate, N (%) | 28-day death rate, N (%) |
|--------------------------------------|-------------------------|------------------------------------|--------------------------|
| <b>Solid tumors</b>                  |                         |                                    |                          |
| Bladder                              | 336                     | 73 (21.7)                          | 51 (15.2)                |
| Brain                                | 47                      | 12 (25.5)                          | 6 (12.8)                 |
| Breast                               | 1,272                   | 171 (13.4)                         | 78 (6.1)                 |
| Cervix                               | 1,330                   | 44 (3.3)                           | 6 (0.5)                  |
| Colorectal                           | 676                     | 138 (20.4)                         | 64 (9.5)                 |
| Kidney                               | 271                     | 42 (15.5)                          | 21 (7.7)                 |
| Liver                                | 71                      | 16 (22.5)                          | 8 (11.3)                 |
| Lung                                 | 321                     | 100 (31.2)                         | 57 (17.8)                |
| Melanoma                             | 125                     | 12 (9.6)                           | 10 (8.0)                 |
| Prostate                             | 1,000                   | 205 (20.5)                         | 81 (8.1)                 |
| Esophagus, stomach, pancreas         | 132                     | 34 (25.7)                          | 14 (10.6)                |
| Thyroid, oropharyngeal, larynx       | 698                     | 79 (11.3)                          | 11 (1.5)                 |
| Testis, ovary, and uterus            | 467                     | 59 (12.6)                          | 21 (4.5)                 |
| Other solid tumors                   | 439                     | 76 (17.3)                          | 47 (10.7)                |
| <b>Hematologic malignancies</b>      |                         |                                    |                          |
| Leukemia                             | 227                     | 71 (31.3)                          | 37 (16.3)                |
| Hodgkin's and non-Hodgkin's lymphoma | 438                     | 82 (18.7)                          | 41 (9.3)                 |
| Myeloma                              | 171                     | 60 (35.1)                          | 31 (18.1)                |
| Other hematologic malignancies       | 357                     | 108 (30.3)                         | 54 (15.1)                |

**eTable 12.** Risk of hospitalization, ICU admission, and mortality in the cancer subcohort (hematologic malignancies vs solid tumor) adjusted for age, sex, and COVID-19 vaccination

| Variable                                            | Adjusted HR (95% CI)   |                      |                  |
|-----------------------------------------------------|------------------------|----------------------|------------------|
|                                                     | 14-day hospitalization | 21-day ICU admission | 28-day mortality |
| Hematologic malignancies vs solid tumors            | 1.61 (1.42-1.82)       | 1.18 (0.93-1.50)     | 1.65 (1.38-1.98) |
| COVID-19 vaccination status (baseline unvaccinated) | 0.90 (0.75-1.1)        | 1.10 (0.76-1.60)     | 0.54 (0.38-0.75) |
| 1-dose                                              | 0.60 (0.46-0.78)       | 0.97 (0.58-1.64)     | 0.51 (0.34-0.77) |
| ≥2-dose                                             |                        |                      |                  |
| Age, 1 year increase                                | 1.04 (1.03-1.05)       | 0.98 (0.98-0.99)     | 1.07 (1.07-1.08) |
| Sex (male vs female)                                | 1.46 (1.31-1.62)       | 1.40 (1.12-1.74)     | 1.59 (1.36-1.87) |

**eFigure 1.** Study Flow Diagram

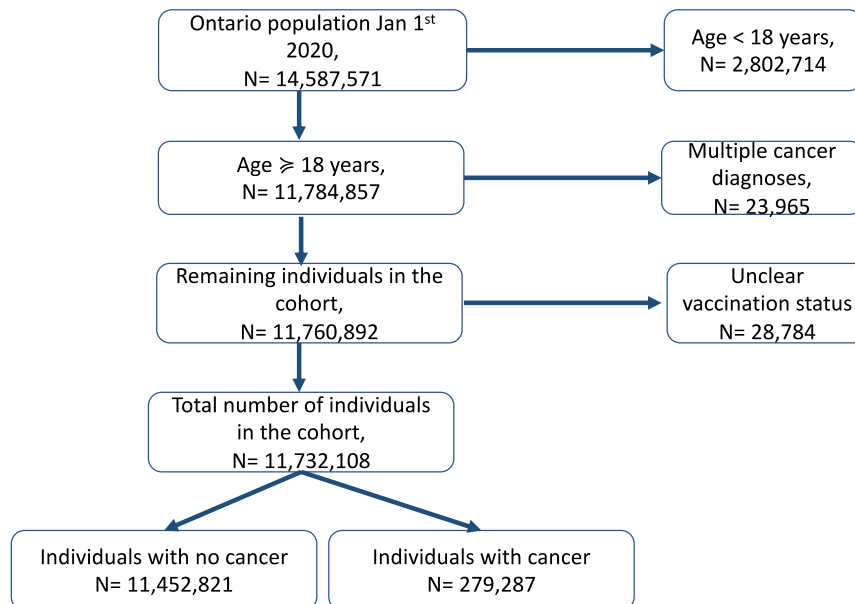

eFigure 2. Frequency of cancer types in the cohort

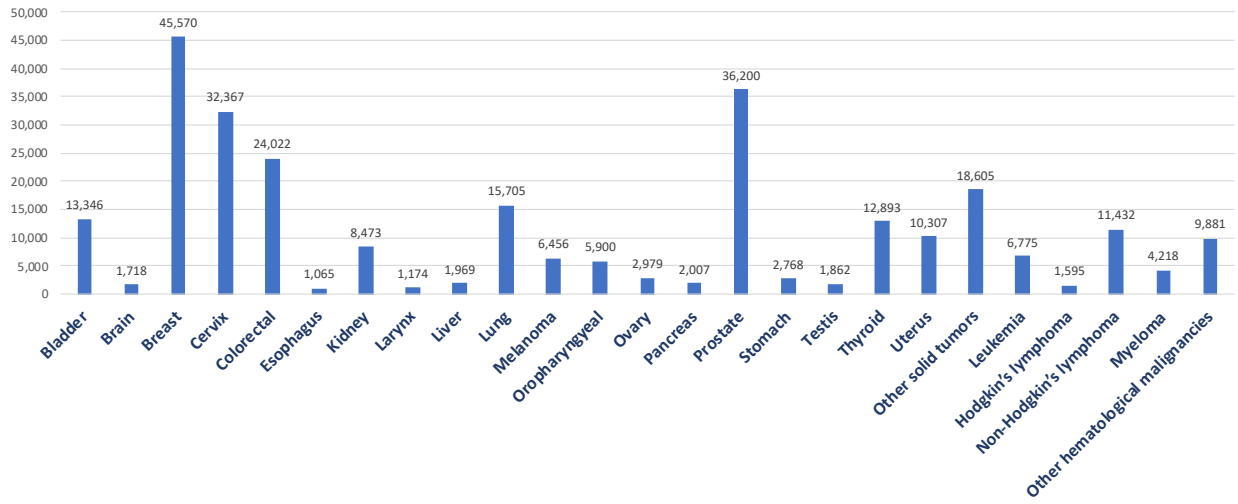

eFigure 3. three-month trends of SARS-CoV-2 infection in cancer subcohort

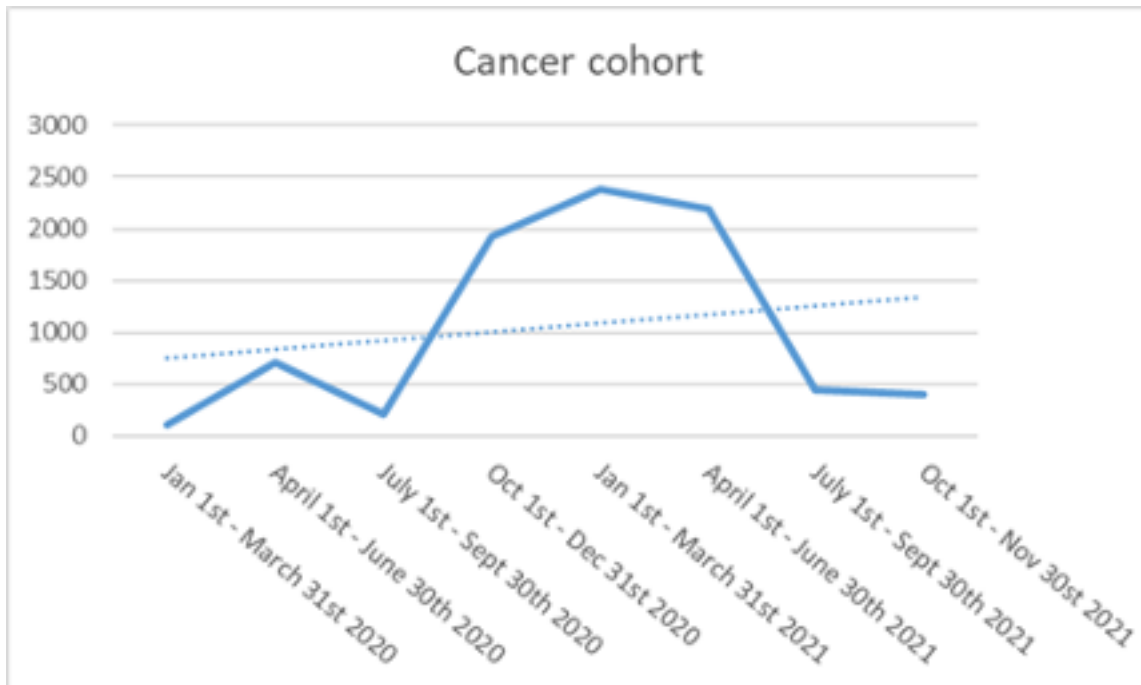

Supplement: jamanetwopen-e2331617-s001.pdf [file jamanetwopen-e2331617-s001.pdf]
