# Supplementary material for: SARS-CoV-2 Infection, Hospitalization, and Mortality in Adults With and Without Cancer
Source: PubMed Central journal article supplement (PMC10472189; doi:10.1001/jamanetworkopen.2023.31617), 2023-08-31
Supplement: jamanetwopen-e2331617-s002.pdf [file jamanetwopen-e2331617-s002.pdf]

## Data Sharing Statement

Hosseini-Moghaddam. SARS-CoV-2 Infection, Hospitalization, and Mortality in Adults With and Without Cancer. *JAMA Netw Open*. Published August 31, 2023.  
doi:10.1001/jamanetworkopen.2023.31617

### Data

**Data available:** No
